# Supplementary material for: Validation of the English Version of the 14-Item Mediterranean Diet Adherence Screener of the PREDIMED Study, in People at High Cardiovascular Risk in the UK
Source: MDPI journal article supplement (doi:10.3390/nu10020138), 2018-01-28
Supplement: s1 [file s1]

## Supplementary Materials I

**Table S1** Mediterranean Diet Adherence Screener (MEDAS) items and allocation of food intake data from food records into its food groups

| MEDAS item                                                          | Criteria for obtaining 1 point | Food (and sub-food) groups created from food record data to derive the MEDAS food groups                                                                                                                                                                                                                                                                                                                                                                                                                                                                                                                                                                                                                                                                                                                            | Data from food records used to calculate MEDAS food groups                                                                                                                                                                                                                                                                                                                                                                                                                                                                                                                                                                                                                                                                                             |
|---------------------------------------------------------------------|--------------------------------|---------------------------------------------------------------------------------------------------------------------------------------------------------------------------------------------------------------------------------------------------------------------------------------------------------------------------------------------------------------------------------------------------------------------------------------------------------------------------------------------------------------------------------------------------------------------------------------------------------------------------------------------------------------------------------------------------------------------------------------------------------------------------------------------------------------------|--------------------------------------------------------------------------------------------------------------------------------------------------------------------------------------------------------------------------------------------------------------------------------------------------------------------------------------------------------------------------------------------------------------------------------------------------------------------------------------------------------------------------------------------------------------------------------------------------------------------------------------------------------------------------------------------------------------------------------------------------------|
| 1. Do you use olive oil as the principal source of fat for cooking? | Yes                            | <p>Olive oil:</p> <p>2F. Vegetables cooked with olive oil</p> <p>2J. Mixed vegetable dishes cooked with olive oil</p> <p>4B. Red meat cooked with olive oil</p> <p>4F. Mixed red meat dishes cooked with olive oil</p> <p>8B. Pulses cooked with olive oil</p> <p>8F. Mixed pulse dishes cooked with olive oil</p> <p>9B. Fish cooked with olive oil</p> <p>9F. Mixed fish dishes cooked with olive oil</p> <p>9J. Shellfish/seafood cooked with olive oil</p> <p>9N. Mixed shellfish/seafood dishes cooked with olive oil</p> <p>12B. Poultry and rabbit dishes cooked with olive oil</p> <p>14B. Miscellaneous foods cooked with olive oil</p> <p>Butter, margarine, cream:</p> <p>2G. Vegetables cooked with butter, margarine, cream</p> <p>2K. Mixed vegetable dishes cooked with butter, margarine, cream</p> | <p>Average olive oil per 100g of total dish = (olive oil quantity/100) * 13.5g</p> <p>Average butter/margarine/cream per 100g of total dish = (butter/margarine/cream quantity/100) * 12g</p> <p>Average other fats per 100g of total dish (other fats quantity/100)* 13.5g</p> <p>Total olive oil (g) = ‘2F’ (g) + ‘2J’ (g) + ‘4B’ (g) + ‘4F’ (g) + ‘8B’ (g) + ‘8F’ (g) + ‘9B’ (g) + ‘9F’ (g) + ‘9J’ (g) + ‘9N’ (g) + ‘12B’ (g) + ‘14B’ (g)</p> <p>Total butter, margarine, cream (g) = ‘2G’ (g) + ‘2K’ (g) + ‘4C’ (g) + ‘4G’ (g) + ‘8C’ (g) + ‘8G’ (g) + ‘9C’ (g) + ‘9G’ (g) + ‘9K’ (g) + ‘9O’ (g) + ‘12C’ (g) + ‘14C’ (g)</p> <p>Total other fats (g) = ‘2H’ (g) + ‘2L’ (g) + ‘4D’ (g) + ‘4H’ (g) + ‘8D’ (g) + ‘8H’ (g) + ‘9D’ (g) + ‘9H’ (g) +</p> |

|                                                                         |                                                                                            |
|-------------------------------------------------------------------------|--------------------------------------------------------------------------------------------|
| 4C. Red meat cooked with butter, margarine, cream                       | '9L' (g) + '9P' (g) + '12D (g) + '14D' (g)                                                 |
| 4G. Mixed red meat dishes cooked with butter, margarine, cream          | 1 point: Total olive oil (g) > [Total butter, margarine, cream (g) + Total other fats (g)] |
| 8C. Pulses cooked with butter, margarine, cream                         |                                                                                            |
| 8G. Mixed pulse dishes cooked with butter, margarine, cream             |                                                                                            |
| 9C. Fish cooked with butter, margarine, cream                           |                                                                                            |
| 9G. Mixed fish dishes cooked with butter, margarine, cream              |                                                                                            |
| 9K. Shellfish/seafood cooked with butter, margarine, cream              |                                                                                            |
| 9O. Mixed shellfish/seafood dishes cooked with butter, margarine, cream |                                                                                            |
| 12C. Poultry and rabbit dishes cooked with butter, margarine, cream     |                                                                                            |
| 14C. Miscellaneous foods cooked with butter, margarine, cream           |                                                                                            |
| Other fats:                                                             |                                                                                            |
| 2H. Vegetables cooked with other fats                                   |                                                                                            |
| 2L. Mixed vegetable dishes cooked with other fats                       |                                                                                            |
| 4D. Red meat cooked with other fats                                     |                                                                                            |
| 4H. Mixed red meat dishes cooked with other fats                        |                                                                                            |
| 8D. Pulses cooked with other fats                                       |                                                                                            |
| 8H. Mixed pulse dishes cooked with other fats                           |                                                                                            |
| 9D. Fish cooked with other fats                                         |                                                                                            |
| 9H. Mixed fish dishes cooked with other fats                            |                                                                                            |

|                                                                                                                                                       |                                                |                                                                                                                                                                                                                                                                                                                                                                                                                                                                                                                                                                                                                                                                                                                            |                                                                                                                                                                                                                                                                                           |
|-------------------------------------------------------------------------------------------------------------------------------------------------------|------------------------------------------------|----------------------------------------------------------------------------------------------------------------------------------------------------------------------------------------------------------------------------------------------------------------------------------------------------------------------------------------------------------------------------------------------------------------------------------------------------------------------------------------------------------------------------------------------------------------------------------------------------------------------------------------------------------------------------------------------------------------------------|-------------------------------------------------------------------------------------------------------------------------------------------------------------------------------------------------------------------------------------------------------------------------------------------|
|                                                                                                                                                       |                                                | 9L. Shellfish/seafood cooked with other fats                                                                                                                                                                                                                                                                                                                                                                                                                                                                                                                                                                                                                                                                               |                                                                                                                                                                                                                                                                                           |
|                                                                                                                                                       |                                                | 9P. Mixed shellfish/seafood dishes cooked with other fats                                                                                                                                                                                                                                                                                                                                                                                                                                                                                                                                                                                                                                                                  |                                                                                                                                                                                                                                                                                           |
|                                                                                                                                                       |                                                | 12D. Poultry and rabbit dishes cooked with other fats                                                                                                                                                                                                                                                                                                                                                                                                                                                                                                                                                                                                                                                                      |                                                                                                                                                                                                                                                                                           |
|                                                                                                                                                       |                                                | 14D. Miscellaneous foods cooked with other fats                                                                                                                                                                                                                                                                                                                                                                                                                                                                                                                                                                                                                                                                            |                                                                                                                                                                                                                                                                                           |
| 2. How much olive oil do you consume per day<br>(including that used in frying, meals eaten away from home, salads, etc.)? (1 tablespoon = 13.5g)     | 4 or more<br>tablespoons                       | 1. Olive oil (raw, e.g. added to salad)<br>2B. Salad and raw vegetables with olive oil<br>2F. Vegetables cooked with olive oil<br>2J. Mixed vegetable dishes cooked with olive oil<br>4B. Red meat cooked with olive oil<br>4F. Mixed red meat dishes cooked with olive oil<br>8B. Pulses cooked with olive oil<br>8F. Mixed pulse dishes cooked with olive oil<br>9B. Fish cooked with olive oil<br>9F. Mixed fish dishes cooked with olive oil<br>9J. Shellfish/seafood cooked with olive oil<br>9N. Mixed shellfish/seafood dishes cooked with olive oil<br>12B. Poultry and rabbit dishes cooked with olive oil<br>14B. Miscellaneous foods cooked with olive oil<br>All foods/meals prepared or cooked with olive oil | Total olive oil (g) = '1' (g) + '2B' (g) + '2F' (g) + '2J' (g) + '4B' (g) + '4F' (g) + '8B' (g) + '8F' (g) + '9B' (g) + '9F' (g) + '9J' (g) + '9N' (g) + '12B' (g) + '14B' (g)<br><br>Total olive oil (servings) = Total olive oil (g)/13.5<br><br>1 point: Total olive oil (servings) ≥4 |
| 3. How many servings of vegetables do you consume per day? (1 serving = 200g - side dishes count as ½ a serving, not including potatoes or sweetcorn) | 2 or more (at least 1 portion raw or as salad) | 2A. Salad and raw vegetables with no fat<br>2B. Salad and raw vegetables with olive oil<br>2C. Salad and raw vegetables with butter, margarine, cream<br>2D. Salad and raw vegetables with other fats                                                                                                                                                                                                                                                                                                                                                                                                                                                                                                                      | All vegetables (raw/salad and cooked):<br><br>Total vegetables (g) = '2A' (g) + '2B' (g) + '2C' (g) + '2D' (g) + '2E' (g) + '2F' (g) + '2G' (g) + '2H' (g) + '2I' (g) + '2J' (g) + '2K' (g) + '2L' (g)                                                                                    |

|                                                                                                                                         |             |                                                                                                                         |                                                                                            |
|-----------------------------------------------------------------------------------------------------------------------------------------|-------------|-------------------------------------------------------------------------------------------------------------------------|--------------------------------------------------------------------------------------------|
|                                                                                                                                         |             | 2E. Vegetables cooked with no fat                                                                                       | Total vegetables (servings) = Total vegetables (g)/200                                     |
|                                                                                                                                         |             | 2F. Vegetables cooked with olive oil                                                                                    |                                                                                            |
|                                                                                                                                         |             | 2G. Vegetables cooked with butter, margarine, cream                                                                     | Raw vegetables/salad:                                                                      |
|                                                                                                                                         |             | 2H. Vegetables cooked with other fats                                                                                   | Total raw vegetables (g) = ‘2A’ (g) + ‘2B’ (g) + ‘2C’ (g) + ‘2D’ (g)                       |
|                                                                                                                                         |             | 2J. Mixed vegetable dishes cooked with olive oil                                                                        | Total raw vegetables (servings) = Total raw vegetables (g)/200                             |
|                                                                                                                                         |             | 2K. Mixed vegetable dishes cooked with butter, margarine, cream                                                         |                                                                                            |
|                                                                                                                                         |             | 2L. Mixed vegetable dishes cooked with other fats                                                                       | 1 point: Total vegetables (servings) ≥2 and total raw vegetables (servings) ≥1             |
|                                                                                                                                         |             | All vegetables (excluding potatoes and sweetcorn), including home-prepared, retail, in ready meals and canned varieties |                                                                                            |
| 4. How many pieces of fruit (including fresh-squeezed fruit juice) do you consume per day? <i>(not including frozen or dried fruit)</i> | 3 or more   | 3A. Raw fresh fruit (not canned)                                                                                        | Total fresh fruit (g) = ‘3A’ (g) + ‘3C’ (g)                                                |
|                                                                                                                                         |             | 3B. Fresh fruit juice (freshly squeezed)                                                                                | Total fresh fruit (servings) = Total fresh fruit (g)/80                                    |
|                                                                                                                                         |             | 3C. Freshly cooked fruits                                                                                               |                                                                                            |
|                                                                                                                                         |             |                                                                                                                         | Total fresh fruit juice (ml) = ‘3B’ (ml)                                                   |
|                                                                                                                                         |             |                                                                                                                         | Total fresh fruit juice (servings) = Total fresh fruit juice (ml)/100                      |
|                                                                                                                                         |             |                                                                                                                         | Total fruit (servings) = Total fresh fruit (servings) + Total fresh fruit juice (servings) |
|                                                                                                                                         |             |                                                                                                                         | 1 point: Total fruit (servings) ≥3                                                         |
| 5. How many servings of red meat, hamburger, or meat                                                                                    | Less than 1 | 4A. Red meat cooked with no fat                                                                                         | Total red meat (g) = ‘4A’ (g) + ‘4B’ (g) + ‘4C’ (g) +                                      |

|                                                                                                                    |             |                                                                                                                                                                                                                                                                                                                                                                                                                                                                                                                                                                                                                                                                                                                                   |                                                                                                                                                                                                                                                                                                                                                                            |
|--------------------------------------------------------------------------------------------------------------------|-------------|-----------------------------------------------------------------------------------------------------------------------------------------------------------------------------------------------------------------------------------------------------------------------------------------------------------------------------------------------------------------------------------------------------------------------------------------------------------------------------------------------------------------------------------------------------------------------------------------------------------------------------------------------------------------------------------------------------------------------------------|----------------------------------------------------------------------------------------------------------------------------------------------------------------------------------------------------------------------------------------------------------------------------------------------------------------------------------------------------------------------------|
| products (ham, sausage, etc.) do you consume per day?<br><i>(1 serving = 100-150g)</i>                             |             | 4B. Red meat cooked with olive oil<br>4C. Red meat cooked with butter, margarine, cream<br>4D. Red meat cooked with other fats<br>4E. Mixed red meat dishes cooked with no fat<br>4F. Mixed red meat dishes cooked with olive oil<br>4G. Mixed red meat dishes cooked with butter, margarine, cream<br>4H. Mixed red meat dishes cooked with other fats<br>All red meat (pork, lamb, beef, veal, meat products, including mixed dishes, homemade, retail, ready meals, take-away)                                                                                                                                                                                                                                                 | $'4D' (g) + '4E' (g) + '4F' (g) + '4G' (g) + '4H' (g)$<br>$\text{Total red meat (servings)} = \text{Total red meat (g)} / 125$<br><br>1 point: Total red meat (servings) <1                                                                                                                                                                                                |
| 6. How many servings of butter, margarine, or cream do you consume per day? <i>(1 serving = 12g, 1 tablespoon)</i> | Less than 1 | 5. Butter, margarine and cream (all types of butter, margarine and fat spreads, and cream, including whipped), and:<br>2C. Salad and raw vegetables with butter, margarine, cream<br>2G. Vegetables cooked with butter, margarine, cream<br>2K. Mixed vegetable dishes cooked with butter, margarine, cream<br>4C. Red meat cooked with butter, margarine, cream<br>4G. Mixed red meat dishes cooked with butter, margarine, cream<br>8C. Pulses cooked with butter, margarine, cream<br>8G. Mixed pulse dishes cooked with butter, margarine, cream<br>9C. Fish cooked with butter, margarine, cream<br>9G. Mixed fish dishes cooked with butter, margarine, cream<br>9K. Shellfish/seafood cooked with butter, margarine, cream | $\text{Total butter, margarine, cream (g)} = '5' (g) + '2C' (g) + '2G' (g) + '2K' (g) + '4C' (g) + '4G' (g) + '8C' (g) + '8G' (g) + '9C' (g) + '9G' (g) + '9K' (g) + '9O' (g) + '12C' (g) + '14C' (g)$<br>$\text{Total butter, margarine, cream (servings)} = \text{Total butter, margarine, cream (g)} / 12$<br><br>1 point: Total butter, margarine, cream (servings) <1 |

|                                                                                                         |                   |                                                                                                                                                                                                                       |                                                                                                                                                                                                               |
|---------------------------------------------------------------------------------------------------------|-------------------|-----------------------------------------------------------------------------------------------------------------------------------------------------------------------------------------------------------------------|---------------------------------------------------------------------------------------------------------------------------------------------------------------------------------------------------------------|
|                                                                                                         |                   | 9O. Mixed shellfish/seafood dishes cooked with butter, margarine, cream<br>12C. Poultry and rabbit dishes cooked with butter, margarine, cream<br>14C. Miscellaneous foods/meals cooked with butter, margarine, cream |                                                                                                                                                                                                               |
| 7. How many sugar-sweetened beverages do you drink per day? (1 cup = 100 ml)                            | Less than 1 cup   | 6. All sugary soft drinks (whether carbonated or not, e.g. squash, cordial, soda, energy drinks). Does not include coffee and other warm beverages containing sugar                                                   | Total sugar-sweetened beverages (ml) = '6' (ml)<br>Total sugar-sweetened beverages (servings) = Total sugar-sweetened beverages (ml)/100<br><br>1 point: Total sugar-sweetened beverages (servings) <1        |
| 8. How much wine do you drink per week? (1 glass = 125 ml)                                              | 7 or more glasses | 7. Wine (red, white, rose, including champagne and prosecco types)                                                                                                                                                    | Total wine (ml) = '7' (ml)<br>Total wine (servings) = Total wine (ml)/125<br><br>Total wine (servings/week) = Total wine (servings)/3 *7<br><br>1 point: Total wine (servings/week) ≥7                        |
| 9. How many servings of pulses do you consume per week? (1 serving = 150g) (including canned varieties) | 3 or more         | 8A. Pulses cooked with no fat<br>8B. Pulses cooked with olive oil<br>8C. Pulses cooked with butter, margarine, cream<br>8D. Pulses cooked with other fats<br>8E. Mixed pulse dishes cooked with no fat                | Total pulses (g) = '8A' (g) + '8B' (g) + '8C' (g) + '8D' (g) + '8E' (g) + '8F' (g) + '8G' (g) + '8H' (g)<br>Total pulses (servings) = Total pulses (g)/150<br><br>Total pulses (servings/week) = Total pulses |

|                                                                                                                                            |           |                                                                                                                  |                                                                                                                     |
|--------------------------------------------------------------------------------------------------------------------------------------------|-----------|------------------------------------------------------------------------------------------------------------------|---------------------------------------------------------------------------------------------------------------------|
|                                                                                                                                            |           | 8F. Mixed pulse dishes cooked with olive oil                                                                     | (servings)/3 *7                                                                                                     |
|                                                                                                                                            |           | 8G. Mixed pulse dishes cooked with butter, margarine, cream                                                      |                                                                                                                     |
|                                                                                                                                            |           | 8H. Mixed pulse dishes cooked with other fats                                                                    | 1 point: Total pulses (servings/week) ≥3                                                                            |
|                                                                                                                                            |           | All pulses (including mixed dishes, homemade, retail, ready meals, take-away, baked beans)                       |                                                                                                                     |
| 10. How many servings of fish or shellfish/seafood do you consume per week? (1 serving = 100-150 g fish, or 4-5 pieces or 200 g shellfish) | 3 or more | 9A. Fish cooked with no fat                                                                                      | Fish:                                                                                                               |
|                                                                                                                                            |           | 9B. Fish cooked with olive oil                                                                                   | Total fish (g) = ‘9A’ (g) + ‘9B’ (g) + ‘9C’ (g) + ‘9D’ (g) + ‘9E’ (g) + ‘9F’ (g) + ‘9G’ (g) + ‘9H’ (g)              |
|                                                                                                                                            |           | 9C. Fish cooked with butter, margarine, cream                                                                    |                                                                                                                     |
|                                                                                                                                            |           | 9D. Fish cooked with other fats                                                                                  | Total fish (servings) = Total fish (g)/125                                                                          |
|                                                                                                                                            |           | 9E. Mixed fish dishes cooked with no fat                                                                         |                                                                                                                     |
|                                                                                                                                            |           | 9F. Mixed fish dishes cooked with olive oil                                                                      | Shellfish/seafood:                                                                                                  |
|                                                                                                                                            |           | 9G. Mixed fish dishes cooked with butter, margarine, cream                                                       | Total shellfish/seafood (g) = ‘9I’ (g) + ‘9J’ (g) + ‘9K’ (g) + ‘9L’ (g) + ‘9M’ (g) + ‘9N’ (g) + ‘9O’ (g) + ‘9P’ (g) |
|                                                                                                                                            |           | 9H. Mixed fish dishes cooked with other fats                                                                     |                                                                                                                     |
|                                                                                                                                            |           | 9I. Shellfish/seafood cooked with no fat                                                                         |                                                                                                                     |
|                                                                                                                                            |           | 9J. Shellfish/seafood cooked with olive oil                                                                      | Total shellfish/seafood (servings) = Total shellfish/seafood (g)/200                                                |
|                                                                                                                                            |           | 9K. Shellfish/seafood cooked with butter, margarine, cream                                                       |                                                                                                                     |
|                                                                                                                                            |           | 9L. Shellfish/seafood cooked with other fats                                                                     |                                                                                                                     |
|                                                                                                                                            |           | 9M. Mixed shellfish/seafood dishes cooked with no fat                                                            | Total fish and shellfish/seafood:                                                                                   |
|                                                                                                                                            |           | 9N. Mixed shellfish/seafood dishes cooked with olive oil                                                         | Total fish and shellfish/seafood (g) = Total fish (g) + Total shellfish/seafood (g)                                 |
|                                                                                                                                            |           | 9O. Mixed shellfish/seafood dishes cooked with butter, margarine, cream                                          |                                                                                                                     |
|                                                                                                                                            |           | 9P. Mixed shellfish/seafood dishes cooked with other fats                                                        | Total fish and shellfish/seafood (servings) = Total fish (servings) + Total shellfish/seafood (servings)            |
|                                                                                                                                            |           | All white and oily fish and shellfish/seafood (including mixed dishes, homemade, retail, ready meals, take-away) | Total fish and shellfish/seafood (servings/week) =                                                                  |

|                                                                                                                                        |               |                                                                                                                                                                                                                                                                                                              |                                                                                                                                                                                                                                                                                                                                                              |
|----------------------------------------------------------------------------------------------------------------------------------------|---------------|--------------------------------------------------------------------------------------------------------------------------------------------------------------------------------------------------------------------------------------------------------------------------------------------------------------|--------------------------------------------------------------------------------------------------------------------------------------------------------------------------------------------------------------------------------------------------------------------------------------------------------------------------------------------------------------|
|                                                                                                                                        |               |                                                                                                                                                                                                                                                                                                              | Total fish and shellfish/seafood (servings)/3 *7                                                                                                                                                                                                                                                                                                             |
|                                                                                                                                        |               |                                                                                                                                                                                                                                                                                                              | 1 point: Total fish and shellfish/seafood (servings/week) $\geq 3$                                                                                                                                                                                                                                                                                           |
| 11. How many times per week do you consume commercial sweets or pastries (not homemade), such as cakes, cookies, biscuits, or custard? | Less than 2   | 10. Commercial sweets and pastries (including all non-homemade sweets and bakery goods)                                                                                                                                                                                                                      | <p>Frequency of consumption of commercial sweets and pastries (times/3 days)</p> <p>Frequency of consumption of commercial sweets and pastries (times/week) = Frequency of consumption of commercial sweets and pastries (times/3 days)/3 *7</p> <p>1 point: Frequency of consumption of commercial sweets and pastries (times/week) <math>&lt; 2</math></p> |
| 12. How many servings of nuts (including peanuts) do you consume per week? ( <i>1 serving = 30g</i> )                                  | 3 or more     | 11. Nuts (all types of salted and unsalted nuts and nut butters, eaten alone or in mixed dishes)                                                                                                                                                                                                             | <p>Total nuts (g) = '11' (g)</p> <p>Total nuts (servings) = Total nuts (g)/30</p> <p>Total nuts (servings/week) = Total nuts (servings)/3 *7</p> <p>1 point: Total nut (servings/week) <math>\geq 3</math></p>                                                                                                                                               |
| 13. Do you prefer to eat chicken, turkey, or rabbit meat instead of beef, pork, hamburgers, or sausages?                               | Yes = 1 point | 12A. Poultry and rabbit dishes cooked with no fat<br>12B. Poultry and rabbit dishes cooked with olive oil<br>12C. Poultry and rabbit dishes cooked with butter, margarine, cream<br>12D. Poultry and rabbit dishes cooked with other fats<br>All poultry (chicken, turkey, duck) and rabbit, including mixed | <p>Total poultry and rabbit (g) = '12A' (g) + '12B' (g) + '12C' (g) + '12D' (g)</p> <p>Total red meat (g) ('4A' (g) + '4B' (g) + '4C' (g) + '4D' (g) + '4E' (g) + '4F' (g) + '4G' (g) + '4H' (g)</p> <p>1 point: Total poultry and rabbit (g) <math>&gt;</math> Total red meat</p>                                                                           |



|                                                                                                                                                                                     |                     |                                                                                         |                                                                                                                                                                                                                                            |
|-------------------------------------------------------------------------------------------------------------------------------------------------------------------------------------|---------------------|-----------------------------------------------------------------------------------------|--------------------------------------------------------------------------------------------------------------------------------------------------------------------------------------------------------------------------------------------|
|                                                                                                                                                                                     |                     | dishes, homemade, retail, ready meals, take-away)                                       | (g)                                                                                                                                                                                                                                        |
| 14. How many times per week do you consume cooked vegetables, pasta, rice, or other dishes prepared with a sauce of tomato, garlic, onions or leeks sautéed in olive oil (sofrito)? | 2 or more = 1 point | 13. Tomato sauce with garlic, onions or leeks and other condiments sautéed in olive oil | Frequency of consumption of sofrito (times/3 days)<br>Frequency of consumption of sofrito (times/week) =<br>Frequency of consumption of sofrito (times/3 days)/3<br>*7<br><br>1 point: Frequency of consumption of sofrito (times/week) ≥2 |
